# Supplementary material for: N,S co-doped hierarchical porous carbon from Chinese herbal residues for high-performance supercapacitors and oxygen reduction reaction
Source: Royal Society of Chemistry journal article supplement (doi:10.1039/d0ra06780f), 2020-01-01
Supplement: d0ra06780f1.pdf [file d0ra06780f1.pdf]

# Supporting information for

## N, S co-doped hierarchical porous carbon from Chinese herbal residues for high-performance supercapacitors and oxygen reduction reaction

Lin Zhang,<sup>a</sup> Qinqin Xu,<sup>a\*</sup> Xia Wang,<sup>a</sup> Qi Sun,<sup>a</sup> Feng He,<sup>a</sup>

Weidong Pan,<sup>b</sup> Haibo Xie<sup>a\*</sup>

<sup>a</sup>Department of New Energy Science & Engineering, College of Materials & Metallurgy, Guizhou University, Huaxi District, Guiyang 550025, P.R. China

<sup>b</sup>State Key Laboratory of Functions and Applications of Medicinal Plants, Guizhou Medical University, 3491 Baijin Road, Guiyang 550014, PR China

\* Corresponding author:

Qinqin Xu: [qqxu1@gzu.edu.cn](mailto:qqxu1@gzu.edu.cn); Haibo Xie: [hbxie@gzu.edu.cn](mailto:hbxie@gzu.edu.cn)

### 1. Figures

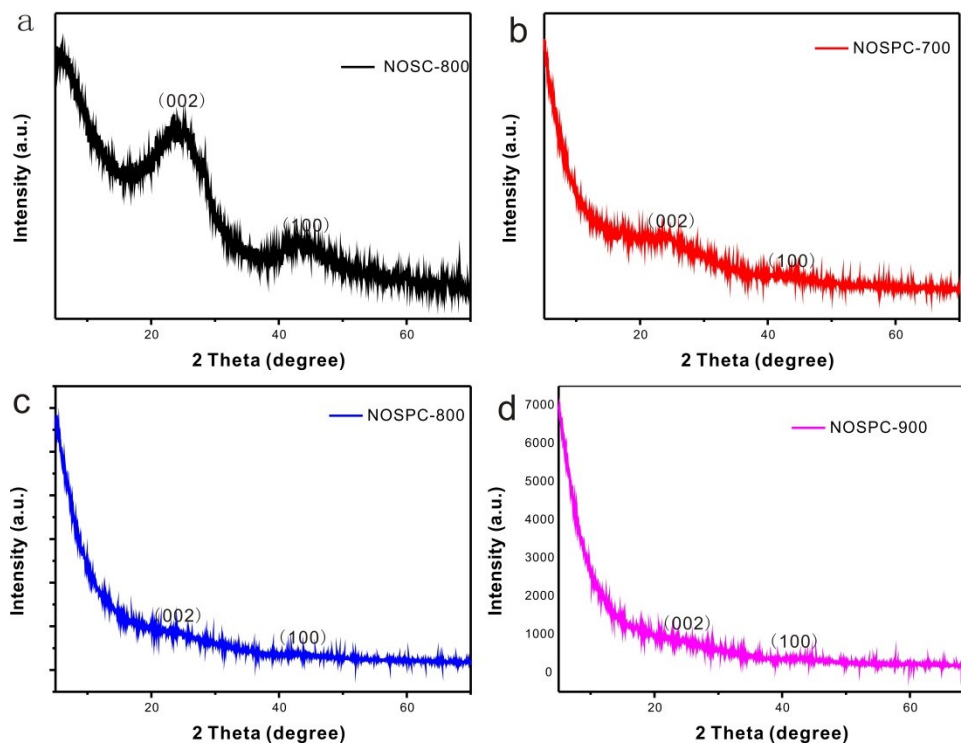

**Fig.S1** PXRD patterns of NOSC-800(a), NOSPC-700(b), NOSPC-800(c) and NOSPC-900(d) samples

## 2. Table

**Table S1** Element analysis of NOSC-800 and NOSPC-X samples

| Samples   | C (%) | O (%) | N (%) | S (%) |
|-----------|-------|-------|-------|-------|
| NOSC-800  | 73.92 | 14.16 | 2.80  | 0.85  |
| NOSPC-700 | 68.97 | 23.03 | 1.11  | 2.53  |
| NOSPC-800 | 82.37 | 12.11 | 0.90  | 2.00  |
| NOSPC-900 | 85.03 | 7.97  | 0.69  | 2.93  |

**Table S2** Comparison of electrochemical performance of activated carbons from biomass precursors

| Biomass precursor                        | SSA<br>(m <sup>2</sup> g <sup>-1</sup> ) | Test system<br>(electrode) / Electrolyte | Current density<br>(A g <sup>-1</sup> ) | Specific capacitance<br>(F g <sup>-1</sup> ) | Ref.             |
|------------------------------------------|------------------------------------------|------------------------------------------|-----------------------------------------|----------------------------------------------|------------------|
| ant powder                               | 2650                                     | 2E/6M KOH                                | 0.1                                     | 352                                          | 1                |
| soybean                                  | 1749                                     | 3E/6M KOH                                | 0.5                                     | 243.2                                        | 2                |
| bamboo char                              | 1732                                     | 3E/6M KOH                                | 0.5                                     | 222.0                                        | 3                |
| perilla frutescens                       | 655                                      | 3E/6M KOH                                | 0.5                                     | 270                                          | 4                |
| willow catkin                            | 1533                                     | 3E/6M KOH                                | 0.5                                     | 298                                          | 5                |
| tobacco rods                             | 2115                                     | 3E/6M KOH                                | 0.5                                     | 286.6                                        | 6                |
| elm samara                               | 1947                                     | 2E/6M KOH                                | 1                                       | 155                                          | 7                |
| willow catkins                           | 1775.7                                   | 3E/6M KOH                                | 1                                       | 292                                          | 8                |
| bagasse                                  | 2296                                     | 3E/6M KOH                                | 0.5                                     | 320                                          | 9                |
| lignocellulosic                          | 952                                      | 3E/6M KOH                                | 1                                       | 225                                          | 10               |
| cornstalk                                | 1588                                     | 3E/1 M H <sub>2</sub> SO <sub>4</sub>    | 1                                       | 407                                          | 11               |
| basswood block                           | 1438                                     | 2E/4M KOH                                | 0.2                                     | 135                                          | 12               |
| cellulose carbamate                      | 3700                                     | 3E/6M KOH                                | 0.5                                     | 339                                          | 13               |
| phoenix leaves                           | 2208                                     | 3E/6M KOH                                | 0.5                                     | 254                                          | 14               |
| <b>Chinese herbal residues (Wubeizi)</b> | <b>3351.8</b>                            | <b>2E/6M KOH</b>                         | <b>0.1</b>                              | <b>324.06</b>                                | <b>This work</b> |

## References

1. G. Y. Zhao, C. Chen, D. F. Yu, L. Sun, C. H. Yang, H. Zhang, Y. Sun, F. Besenbacher and M. Yu, *Nano Energy*, 2018, **47**, 547-555.
2. G. X. Lin, R. G. Ma, Y. Zhou, Q. Liu, X. P. Dong and J. C. Wang, *Electrochimica Acta*, 2018, **261**, 49-57.
3. Y. N. Gong, D. L. Li, C. Z. Luo, Q. Fu and C. X. Pan, *Green Chem.*, 2017, **19**, 4132-4140.
4. B. Liu, Y. J. Liu, H. B. Chen, M. Yang and H. M. Li, *Journal of Power Sources*, 2017, **341**, 309-317.
5. Y. J. Li, G. L. Wang, T. Wei, Z. J. Fan and P. Yan, *Nano Energy*, 2016, **19**, 165-175.
6. Y. Q. Zhao, M. Lu, P. Y. Tao, Y. J. Zhang, X. T. Gong, Z. Yang, G. Q. Zhang and H. L. Li, *Journal of*

- Power Sources*, 2016, **307**, 391-400.
7. C. Chen, D. F. Yu, G. Y. Zhao, B. S. Du, W. Tang, L. Sun, Y. Sun, F. Besenbacher and M. Yu, *Nano Energy*, 2016, **27**, 377-389.
  8. L. J. Xie, G. H. Sun, F. Y. Su, X. Q. Guo, Q. Q. Kong, X. M. Li, X. H. Huang, L. Wan, W. Song, K. X. Li, C. X. Lv and C. M. Chen, *Journal of Materials Chemistry A*, 2016, **4**, 1637-1646.
  9. H. B. Feng, H. Hu, H. W. Dong, Y. Xiao, Y. J. Cai, B. F. Lei, Y. L. Liu and M. T. Zheng, *Journal of Power Sources*, 2016, **302**, 164-173.
  10. H. G. Wei, H. Wang, A. Li, H. Q. Li, D. P. Cui, M. Y. Dong, J. Lin, J. C. Fan, J. X. Zhang, H. Hou, Y. P. Shi, D. F. Zhou and Z. H. Guo, *J. Alloy. Compd.*, 2020, **820**, 10.
  11. C. J. Wang, D. P. Wu, H. J. Wang, Z. Y. Gao, F. Xu and K. Jiang, *Journal of Materials Chemistry A*, 2018, **6**, 1244-1254.
  12. Z. J. Tang, Z. X. Pei, Z. F. Wang, H. F. Li, J. Zeng, Z. H. Ruan, Y. Huang, M. S. Zhu, Q. Xue, J. Yu and C. Y. Zhi, *Carbon*, 2018, **130**, 532-543.
  13. X. Zhou, P. Wang, Y. Zhang, L. Wang, L. Zhang, L. Zhang, L. Xu and L. Liu, *Journal of Materials Chemistry A*, 2017, **5**, 12958-12968.
  14. J. J. He, D. Y. Zhang, Y. L. Wang, J. W. Zhang, B. B. Yang, H. Shi, K. J. Wang and Y. Wang, *Appl. Surf. Sci.*, 2020, **515**, 12.
